# Supplementary material for: Radiogenomics of C9orf72 Expansion Carriers Reveals Global Transposable Element Derepression and Enables Prediction of Thalamic Atrophy and Clinical Impairment
Source: J Neurosci. 2023 Jan 11;43(2):333–45. doi: 10.1523/JNEUROSCI.1448-22.2022 (PMC9838702; doi:10.1523/JNEUROSCI.1448-22.2022)
Supplement: Figure 4-1 — Gene set enrichment analysis of differential expression results comparing whole blood from symptomatic C9orf72 HRE carriers versus healthy controls. Positive ESs indicate enrichment in C9orf72 HRE carriers. Download Figure 4-1, XLSX file. [file ns-JN-RM-1448-22-s08.xlsx]

## Sheet: Table 2-3
Figure 4-1. Gene set enrichment analysis of differential expression results comparing whole blood from symptomatic C9orf72 HRE carriers versus healthy controls. Positive enrichment scores (ES) indicate enrichment in C9orf72 HRE carriers.
NAME	SIZE	ES	NES	NOM p-val	FDR q-val	FWER p-val	RANK AT MAX	LEADING EDGE
HALLMARK_HEDGEHOG_SIGNALING	23	0.770971	1.71746	0	0	0	2413	tags=57%, list=16%, signal=67%
HALLMARK_KRAS_SIGNALING_DN	72	0.660745	1.5996	0	0.00151415	0.0035	3037	tags=56%, list=20%, signal=69%
HALLMARK_ANGIOGENESIS	22	0.706409	1.56932	0.00221239	0.00260036	0.0089	2651	tags=55%, list=18%, signal=66%
HALLMARK_MYOGENESIS	115	0.631671	1.54587	0	0.00340187	0.0154	3251	tags=50%, list=22%, signal=63%
HALLMARK_EPITHELIAL_MESENCHYMAL_TRANSITION	107	0.623105	1.52522	0	0.00419406	0.0239	2892	tags=43%, list=19%, signal=53%
HALLMARK_APICAL_JUNCTION	129	0.557427	1.37018	0.0003	0.0521504	0.3073	2818	tags=29%, list=19%, signal=35%
HALLMARK_SPERMATOGENESIS	68	0.556079	1.33881	0.0110187	0.0554051	0.4452	3763	tags=38%, list=25%, signal=51%
HALLMARK_ESTROGEN_RESPONSE_EARLY	132	0.550199	1.35412	0.00080008	0.0564095	0.372	3523	tags=36%, list=24%, signal=46%
HALLMARK_ESTROGEN_RESPONSE_LATE	124	0.53781	1.3209	0.0031	0.0588313	0.5363	3523	tags=37%, list=24%, signal=48%
HALLMARK_COAGULATION	76	0.556477	1.34151	0.0088044	0.0600418	0.4329	2753	tags=38%, list=19%, signal=47%
HALLMARK_UV_RESPONSE_DN	108	0.539968	1.32164	0.00440044	0.0639944	0.5316	3340	tags=33%, list=22%, signal=43%
HALLMARK_GLYCOLYSIS	156	0.506574	1.25124	0.0101	0.143151	0.8783	2371	tags=19%, list=16%, signal=22%
HALLMARK_WNT_BETA_CATENIN_SIGNALING	34	0.535414	1.23874	0.136735	0.156948	0.9179	1617	tags=24%, list=11%, signal=26%
HALLMARK_PROTEIN_SECRETION	91	-0.186862	-0.960664	0.666667	0.173473	0.1183	4448	tags=52%, list=30%, signal=73%
HALLMARK_HEME_METABOLISM	187	0.491362	1.21665	0.014	0.196151	0.9637	4042	tags=40%, list=27%, signal=54%
HALLMARK_MITOTIC_SPINDLE	189	0.488596	1.209	0.0171	0.202535	0.9756	3000	tags=26%, list=20%, signal=33%
HALLMARK_G2M_CHECKPOINT	187	0.483099	1.19791	0.0251	0.218933	0.9869	4120	tags=36%, list=28%, signal=50%
HALLMARK_BILE_ACID_METABOLISM	79	0.48966	1.18516	0.114137	0.242426	0.9939	2928	tags=28%, list=20%, signal=34%
Type I interferon response	39	0.502413	1.17572	0.21157	0.244423	0.9969	3103	tags=26%, list=21%, signal=32%
HALLMARK_INTERFERON_ALPHA_RESPONSE	93	0.481625	1.16981	0.116435	0.249818	0.998	4162	tags=37%, list=28%, signal=50%
HALLMARK_KRAS_SIGNALING_UP	137	0.477838	1.17758	0.0663	0.252106	0.9963	4239	tags=36%, list=29%, signal=51%
HALLMARK_REACTIVE_OXYGEN_SPECIES_PATHWAY	48	-0.153711	-0.716316	1	0.26017	0.1978	12591	tags=100%, list=85%, signal=651%
HALLMARK_CHOLESTEROL_HOMEOSTASIS	65	0.482955	1.16192	0.177437	0.261739	0.9989	3751	tags=32%, list=25%, signal=43%
HALLMARK_APICAL_SURFACE	25	0.497515	1.12116	0.320538	0.393923	1	5354	tags=56%, list=36%, signal=87%
HALLMARK_NOTCH_SIGNALING	27	0.472855	1.07382	0.39886	0.591614	1	3979	tags=41%, list=27%, signal=56%
Senescence-associated secretory pathway	41	0.444292	1.03992	0.451221	0.740116	1	4590	tags=46%, list=31%, signal=67%
HALLMARK_HYPOXIA	144	0.414006	1.02037	0.4466	0.810718	1	3003	tags=19%, list=20%, signal=23%
HALLMARK_XENOBIOTIC_METABOLISM	134	0.410702	1.01088	0.478648	0.826201	1	3239	tags=25%, list=22%, signal=31%
HALLMARK_E2F_TARGETS	187	0.394003	0.976635	0.6028	0.955287	1	4133	tags=29%, list=28%, signal=39%
HALLMARK_PEROXISOME	87	0.39521	0.959264	0.625525	0.961244	1	2533	tags=17%, list=17%, signal=21%
HALLMARK_UV_RESPONSE_UP	123	0.392879	0.967055	0.6156	0.962939	1	2418	tags=15%, list=16%, signal=18%
HALLMARK_COMPLEMENT	160	0.382441	0.945539	0.6952	0.980963	1	3511	tags=24%, list=24%, signal=31%
HALLMARK_MYC_TARGETS_V2	58	0.194148	0.463405	0.997694	0.99835	1	3740	tags=16%, list=25%, signal=21%
HALLMARK_UNFOLDED_PROTEIN_RESPONSE	107	-0.229573	---	---	1	0	4072	tags=47%, list=27%, signal=64%
HALLMARK_TNFA_SIGNALING_VIA_NFKB	165	0.320348	0.791691	0.9622	1	1	3546	tags=20%, list=24%, signal=26%
HALLMARK_TGF_BETA_SIGNALING	48	0.390509	0.926824	0.663513	1	1	1617	tags=15%, list=11%, signal=16%
HALLMARK_PI3K_AKT_MTOR_SIGNALING	93	0.221494	0.539499	0.997098	1	1	5067	tags=24%, list=34%, signal=36%
HALLMARK_P53_PATHWAY	171	0.277933	0.688183	0.995	1	1	2968	tags=15%, list=20%, signal=19%
HALLMARK_OXIDATIVE_PHOSPHORYLATION	199	-0.494163	---	---	1	0	3539	tags=54%, list=24%, signal=70%
HALLMARK_MYC_TARGETS_V1	197	-0.55765	---	---	1	0	3425	tags=62%, list=23%, signal=80%
HALLMARK_MTORC1_SIGNALING	196	0.330737	0.821428	0.9483	1	1	2987	tags=17%, list=20%, signal=21%
HALLMARK_INTERFERON_GAMMA_RESPONSE	187	0.359192	0.889573	0.85	1	1	4162	tags=27%, list=28%, signal=37%
HALLMARK_INFLAMMATORY_RESPONSE	149	0.361957	0.892555	0.823182	1	1	5300	tags=38%, list=36%, signal=59%
HALLMARK_IL6_JAK_STAT3_SIGNALING	68	0.338036	0.813768	0.862007	1	1	5375	tags=40%, list=36%, signal=62%
HALLMARK_IL2_STAT5_SIGNALING	171	0.304841	0.753423	0.9819	1	1	3929	tags=22%, list=26%, signal=30%
HALLMARK_FATTY_ACID_METABOLISM	132	0.247811	0.610039	0.9969	1	1	3492	tags=15%, list=23%, signal=20%
HALLMARK_DNA_REPAIR	143	-0.159898	---	---	1	0	2320	tags=24%, list=16%, signal=28%
HALLMARK_APOPTOSIS	137	0.283426	0.695759	0.9896	1	1	4815	tags=28%, list=32%, signal=41%
HALLMARK_ANDROGEN_RESPONSE	87	0.279925	0.681722	0.972283	1	1	4568	tags=24%, list=31%, signal=35%
HALLMARK_ALLOGRAFT_REJECTION	168	-0.25229	---	---	1	0	1758	tags=27%, list=12%, signal=31%
HALLMARK_ADIPOGENESIS	169	0.256805	0.634825	0.9985	1	1	2379	tags=11%, list=16%, signal=13%
